# Supplementary material
Source: bioRxiv or medRxiv preprint supplement (https://www.biorxiv.org/highwire/filestream/92959/field_highwire_adjunct_files/0/302307-1.pdf)
Supplement: Supplementary file [file 302307-1.pdf]

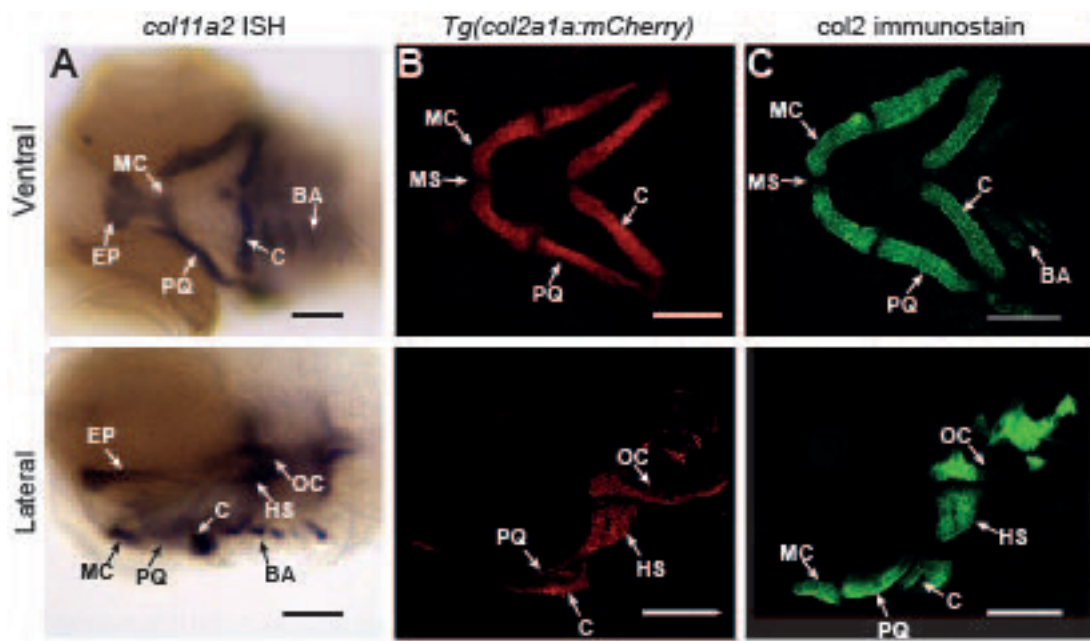

**Supplementary Figure 1: *col11a2* and *col2a1* are expressed in the same regions of the zebrafish lower jaw.** A-C) Ventral and lateral views of zebrafish at 3dpf. A) In situ hybridisation (ISH) for *col11a2* shows its expression in the zebrafish Meckel's cartilage (MC), Meckel's symphysis (MS), palatoquadrate (PQ), ceratohyal (C), and branchial arches (BA) observed ventrally, and the ethmoid plate (EP), otic capsule (OC) and hyosymplectic (HS) laterally. B) The pattern of expression of *col11a2* matches that of *col2a1*, visualised with zebrafish carrying *Tg(col2a1a:mcherry)*. C) Immunostaining for type II collagen (*col2*) indicates protein deposition in the same domains that *col11a2* is expressed. Scale bar = 100µm.

The mechanical impact of *col11a2* loss on joints.

Elizabeth A Lawrence, Erika Kague, Jessye A Aggleton, Robert L Hamman, Karen A Roddy and Chrissy L Hammond.
